# Supplementary material for: Two-dimensional ultrathin nanosheets of Ni–In-layered double hydroxides prepared in water: enhanced performance for DNA adsorption
Source: Royal Society of Chemistry journal article supplement (doi:10.1039/c3ra47728b), 2014-05-27
Supplement: c3ra47728b1.pdf [file c3ra47728b1.pdf]

## Supplementary Information

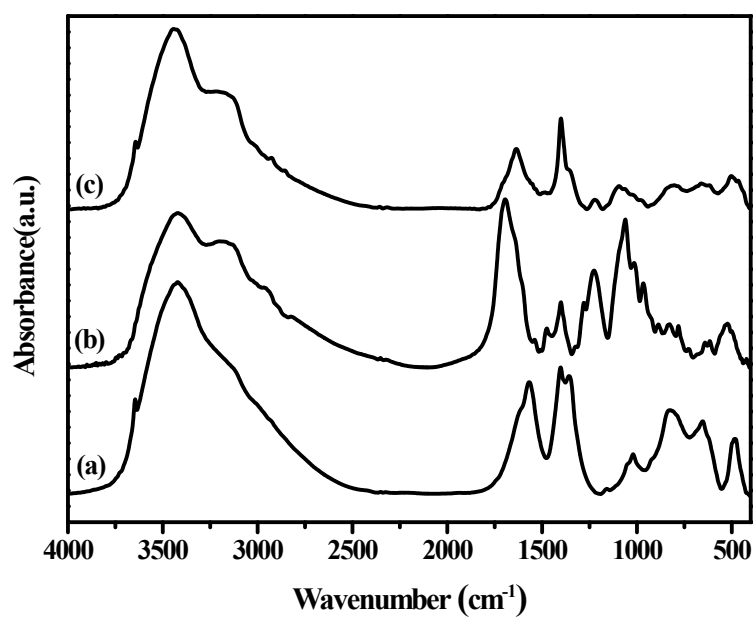

Figure S1. FT-IR spectrum of (a) Ni-In-CH<sub>3</sub>COO<sup>-</sup> LDHs, (b) DNA, (c) DNA-LDHs complexes.

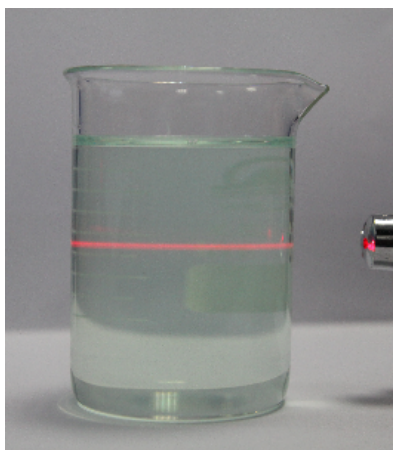

Figure S2. Photograph of the colloidal suspension of Ni-In ELDHs nanosheets.

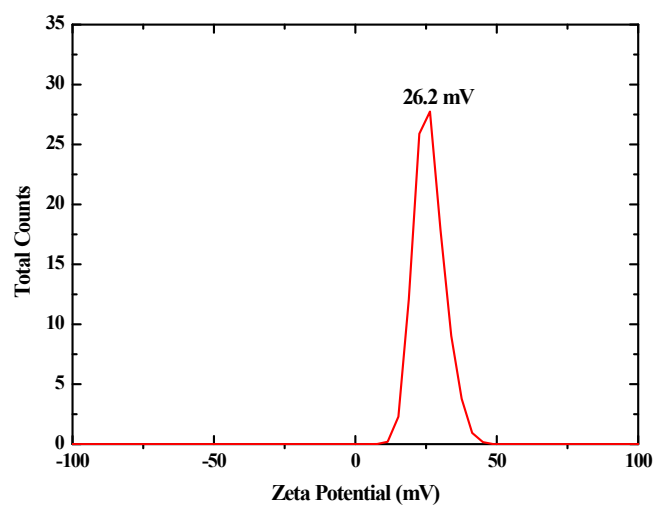

Figure S3. Zeta potential curve of the colloidal suspension of Ni-In ELDHs nanosheets.

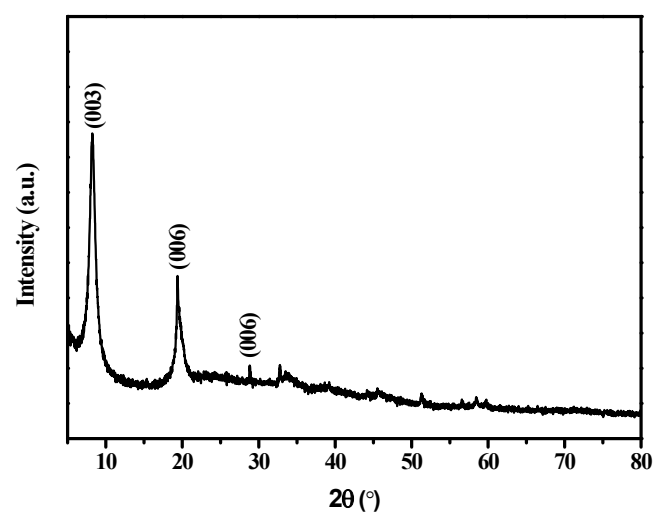

Figure S4. XRD pattern of Ni-In LDHs after DNA desorption by the addition of  $\text{HPO}_4^{2-}$ .
